# Supplementary material for: Rapid identification of an Arabidopsis NLR gene as a candidate conferring susceptibility to Sclerotinia sclerotiorum using time‐resolved automated phenotyping
Source: PubMed Central journal article supplement (PMC7497225; doi:10.1111/tpj.14747), 2020-04-21
Supplement: TPJ-103-903-s001.pdf [file TPJ-103-903-s001.pdf]

FIGURE S1

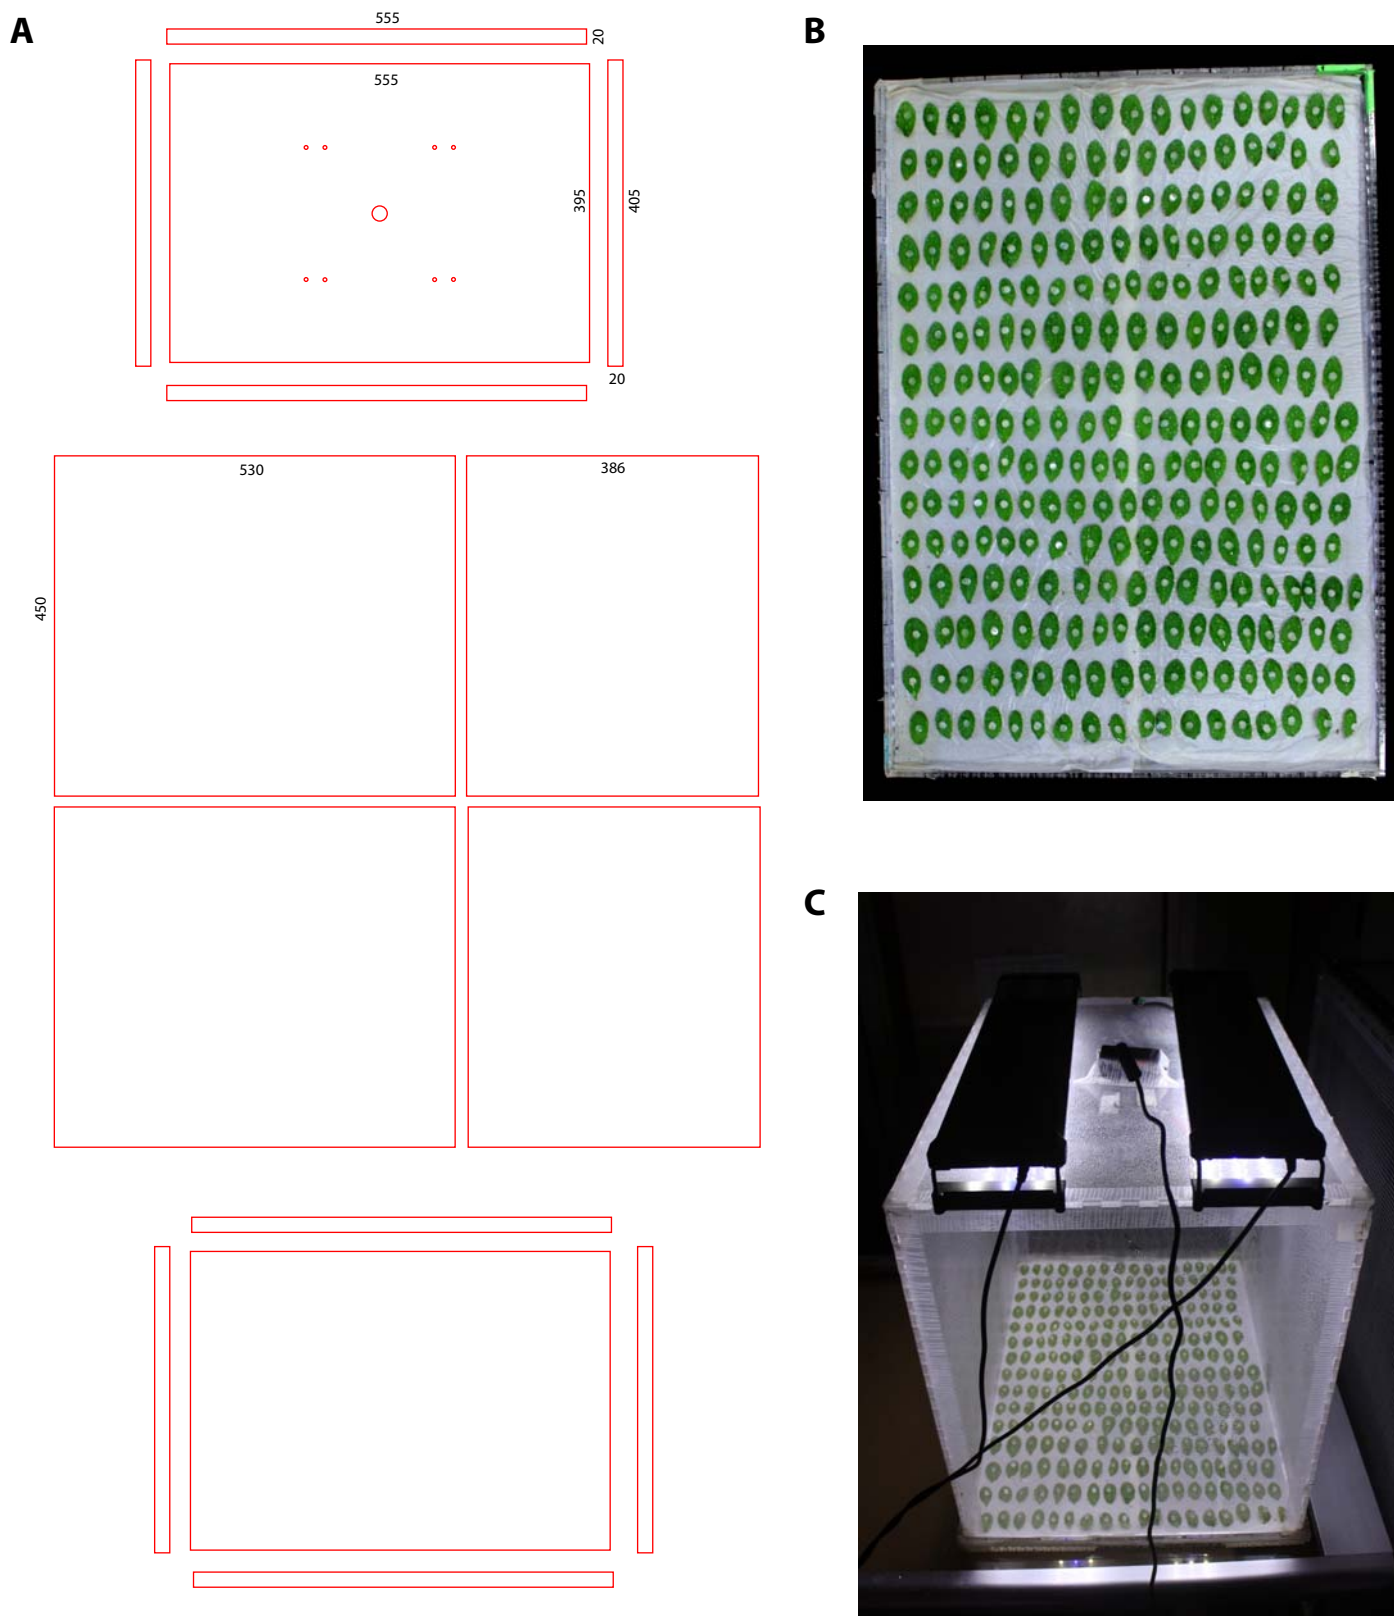

**Figure S1. Illustration of the Navautron box design and use.** (A) Template for PMMA pieces making a Navautron box, with dimensions indicated in mm. (B) A Navautron bottom tray filled with 270 *A. thaliana* leaves inoculated by an agar plug colonized by *S. sclerotiorum*, at the start of an experiment. (C) Navautron phenotyping experiment running, with LED flash lights on.
