# Supplementary material for: Rapid identification of an Arabidopsis NLR gene as a candidate conferring susceptibility to Sclerotinia sclerotiorum using time‐resolved automated phenotyping
Source: PubMed Central journal article supplement (PMC7497225; doi:10.1111/tpj.14747), 2020-04-21
Supplement: TPJ-103-903-s002.pdf [file TPJ-103-903-s002.pdf]

Rapid identification of an Arabidopsis NLR gene conferring susceptibility to *Sclerotinia sclerotiorum* using time-resolved automated phenotyping

Adelin Barbacci\*, Olivier Navaud, Malick Mbengue, Marielle Barascud, Laurence Godiard, Mehdi Khafif, Aline Lacaze, Sylvain Raffaele\*

Supplementary File 1.

The oligonucleotide primers used in this work were as follows:

| Name    | Sequence                    | Use                                                              |
|---------|-----------------------------|------------------------------------------------------------------|
| 5.3LP   | 5'-GCGATTCCGATTCTCTATC-3'   | Forward primer for genotyping of SALK_068316                     |
| 5.3RP   | 5'-CCGCGGGTTAAATCCTAGTAG-3' | Reverse primer for genotyping of SALK_068316                     |
| LBb1.3  | 5'-ATTTTGCCGATTCGGAAC-3'    | T-DNA primer for genotyping SALK lines                           |
| 5.1LP   | 5'-GAAGGTAAAAGCAAACGACCC-3' | Forward primer for genotyping of SALK_087262C                    |
| 5.1RP   | 5'-GCTTGTGAAGCAAGTTCCTTG-3' | Reverse primer for genotyping of SALK_087262C, and LAZ5 Q-RT-PCR |
| Laz5qFw | 5'-CGTCGCATGTTTCTCAAATC-3'  | Forward primer for LAZ5 Q-RT-PCR                                 |
| csaLP   | 5'-CAACCTTCCAAGTAATGCTGC-3' | Forward primer for genotyping of SALK_023219C                    |
| csaRP   | 5'-GGCTGAAATCCCGTTAAAAG-3'  | Reverse primer for genotyping of SALK_023219C                    |

Which hybridized as follows at the LAZ5 genomic locus:

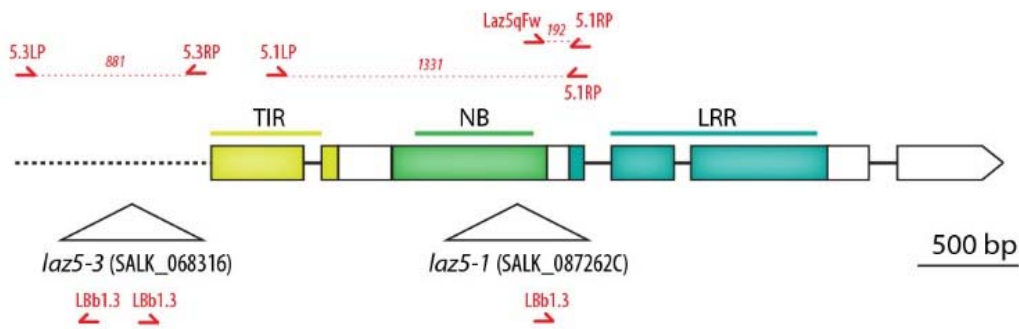

The PCR reaction used for mutant lines genotyping was 95°C 2 min; (95°C 30 sec.; 60°C 30 sec.; 72°C 1 min.) x 35 cycles; 72°C 5 min. Three primer pairs were tested on each plant as shown in the example below.

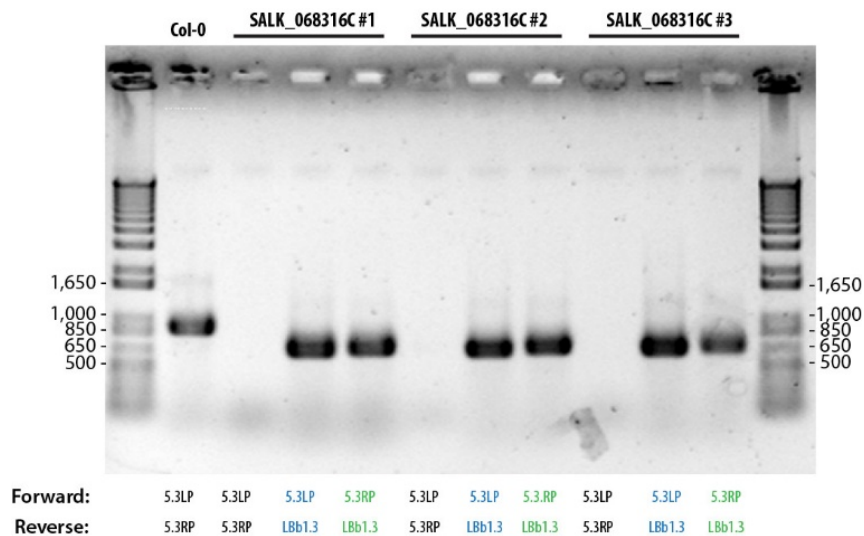

The PCR products obtained from one homozygous line were then sequenced using each of the three genotyping primers.
